# Supplementary material for: Right Cu2− xS@MnS Core–Shell Nanoparticles as a Photo/H2O2‐Responsive Platform for Effective Cancer Theranostics
Source: Adv Sci (Weinh). 2019 Aug 27;6(20):1901461. doi: 10.1002/advs.201901461 (PMC6794717; doi:10.1002/advs.201901461)
Supplement: Supplementary file 1 — Supplementary [file ADVS-6-1901461-s001.pdf]

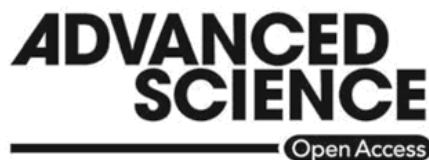

## Supporting Information

for *Adv. Sci.*, DOI: 10.1002/adv.201901461

Right  $\text{Cu}_{2-x}\text{S}@\text{MnS}$  Core–Shell Nanoparticles  
as a Photo/ $\text{H}_2\text{O}_2$ -Responsive Platform for Effective  
Cancer Theranostics

*Xiaojuan Huang, Guoying Deng, Yong Han, Guizhu Yang,  
Rujia Zou, Zhiyuan Zhang,\* Shuyang Sun,\* and Junqing Hu\**

## Supporting Information

**Right  $\text{Cu}_{2-x}\text{S}@\text{MnS}$  core-shell nanoparticles as a photo/ $\text{H}_2\text{O}_2$ -responsive platform for effective cancer theranostics**

*Xiaojuan Huang, Guoying Deng, Yong Han, Guizhu Yang, Rujia Zou, Zhiyuan Zhang\*, Shuyang Sun\*, and Junqing Hu\**

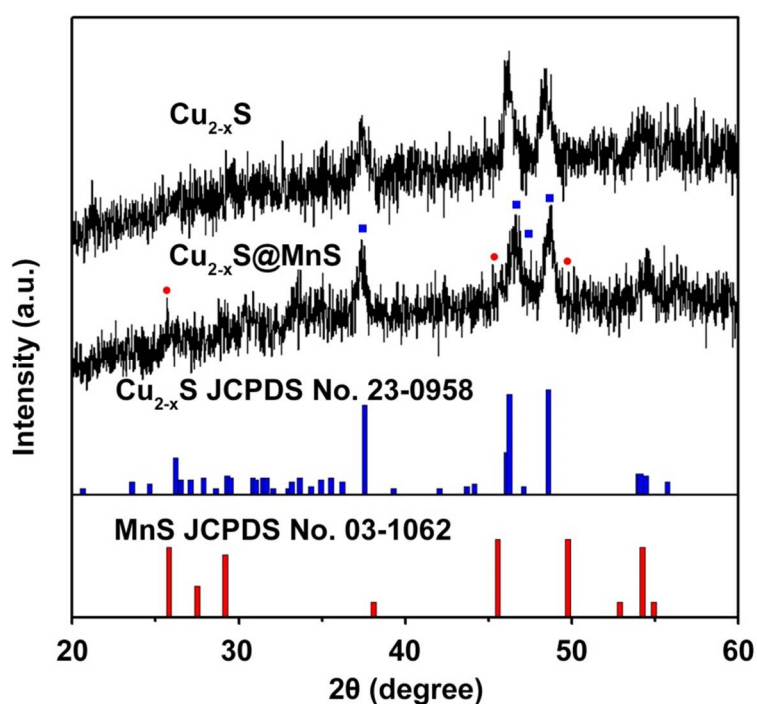

**Figure S1.** XRD pattern of as-prepared  $\text{Cu}_{2-x}\text{S}$  NPs and  $\text{Cu}_{2-x}\text{S}@\text{MnS}$  CSNPs. The blue and red dots above the black line denote monoclinic  $\text{Cu}_{2-x}\text{S}$  (JCPDS No. 23-0959) and hexagonal MnS (JCPDS No. 03-1062), respectively.

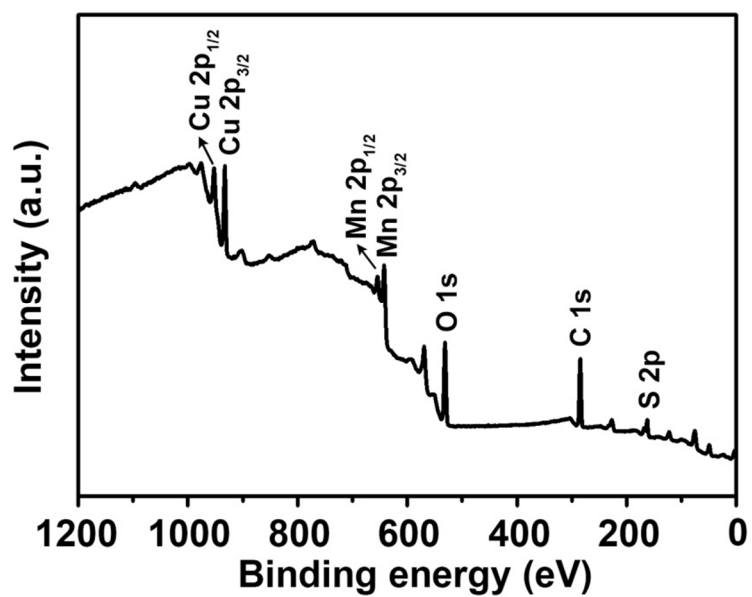

**Figure S2.** XPS survey spectrum of  $\text{Cu}_{2-x}\text{S}@\text{MnS}$  CSNPs.

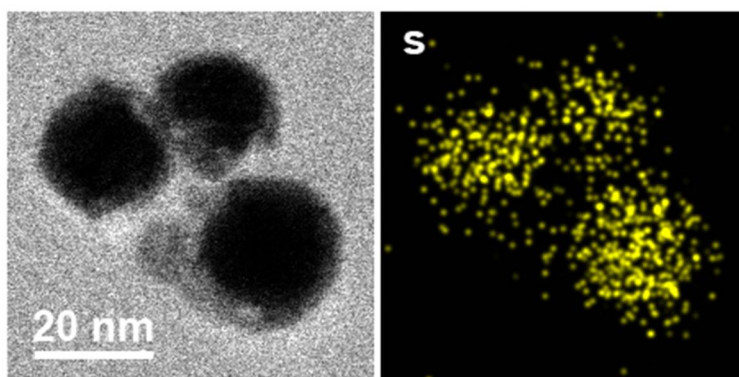

**Figure S3.** TEM elemental mapping with the sulphur window of  $\text{Cu}_{2-x}\text{S}@\text{MnS}$  CSNPs.

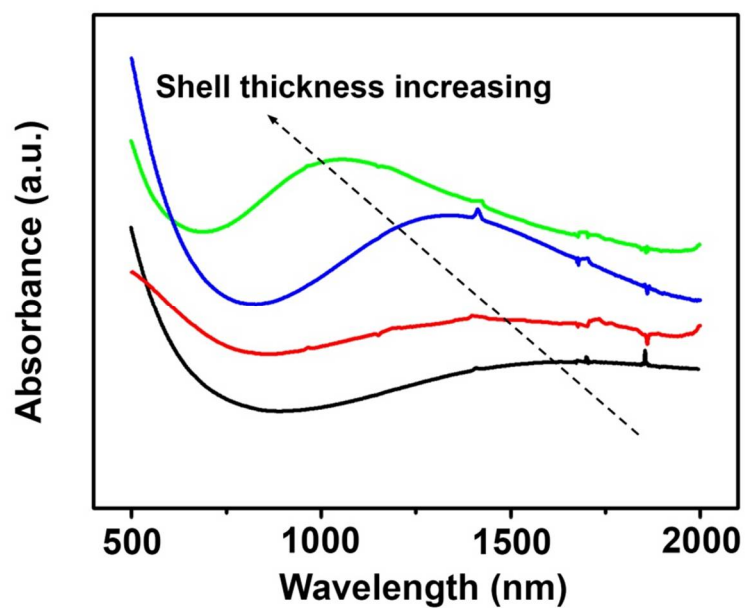

**Figure S4.** Vis-NIR absorption spectroscopy of the  $\text{Cu}_{2-x}\text{S}@\text{MnS}$  CSNPs with different MnS shell thicknesses.

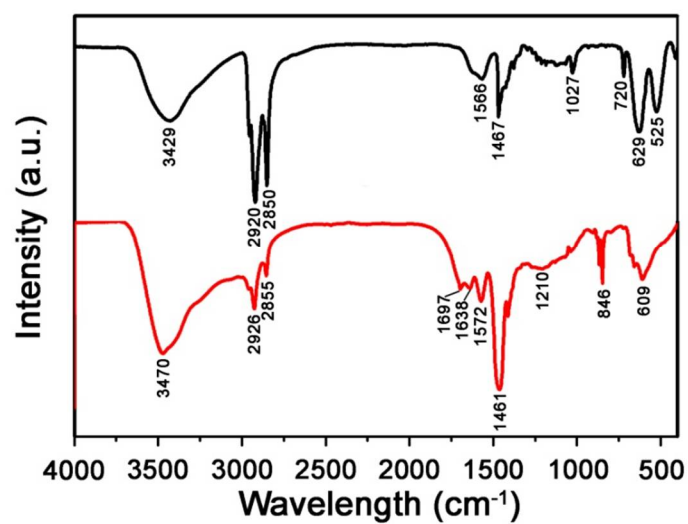

**Figure S5.** FTIR spectroscopy of Cu<sub>2-x</sub>S@MnS CSNPs before and after surface modification.

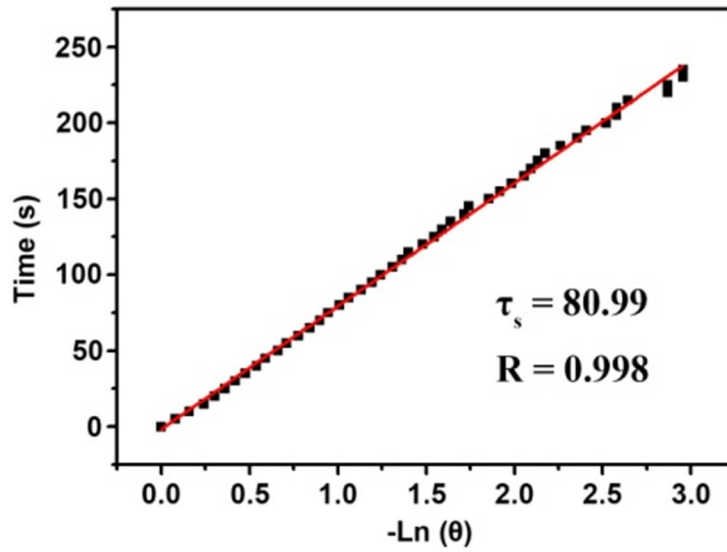

**Figure S6.** Time constant for heat transfer from the system ( $\tau_s$ ), calculated from the cooling period of the panel (Figure 3a).

The photothermal conversion efficiency ( $\eta$ ) is calculated using the following equations, according to published studies from Roper and Hu et al.<sup>[1, 2]</sup>

$$\eta_T = \frac{hS(T_{max} - T_{surr}) - Q_{dis}}{I(1 - 10^{-A_{\lambda}})} \quad (1)$$

$$hS = \frac{m \cdot C_{H_2O}}{\tau_s} \quad (2)$$

$$t = -\tau_s \ln \theta = -\tau_s \ln \left( \frac{T - T_{surr}}{T_{max} - T_{surr}} \right) \quad (3)$$

where  $h$ ,  $S$ , and  $Q_{dis}$  are the respective heat transfer coefficient, irradiated area, and baseline energy inputted by the sample cell;  $T_{max}$  and  $T_{surr}$  are the highest temperature of the system and the surrounding temperature, respectively;  $I$  and  $A_{808 \text{ nm}}$  are the respective power density of the laser and absorption of  $\text{Cu}_{2-x}\text{S}@\text{MnS}$  CSNPs at 808 nm;  $m$  and  $C_p$  are the mass and thermal capacity of the sample, respectively; and  $t$  is the time of the cooling process after irradiation.

In this work,  $\tau_s$  was calculated as 80.99 s, as obtained from the linear fitting in Figure S6. The values of  $m$  and  $C_p$  are 0.1 g and 4.2 J/(g·°C), respectively, and  $Q_{dis}$ ,  $A_{808 \text{ nm}}$ ,  $I$  and  $(T_{max} - T_{surr})$  are measured as 15.45 mW, 0.537, 276.48 mW, and 21.1 °C, respectively. Above all, the photothermal conversion efficiency was calculated to be 47.9%.

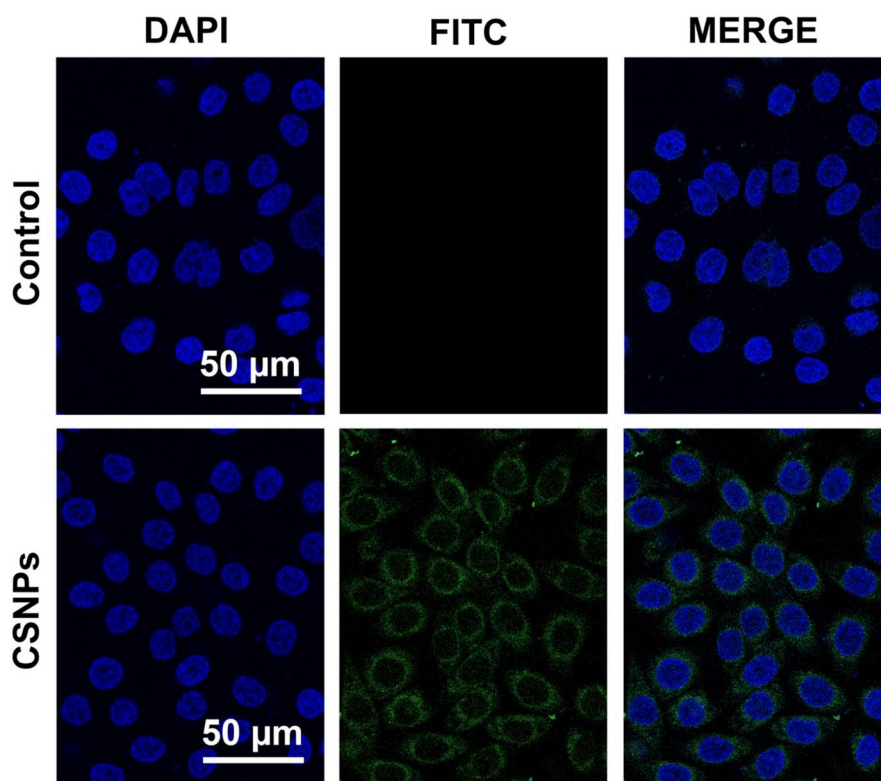

**Figure S7.** CLSM images of HeLa cells incubated with  $\text{Cu}_{2-x}\text{S}@\text{MnS}$ -FITC CSNPs suspension.

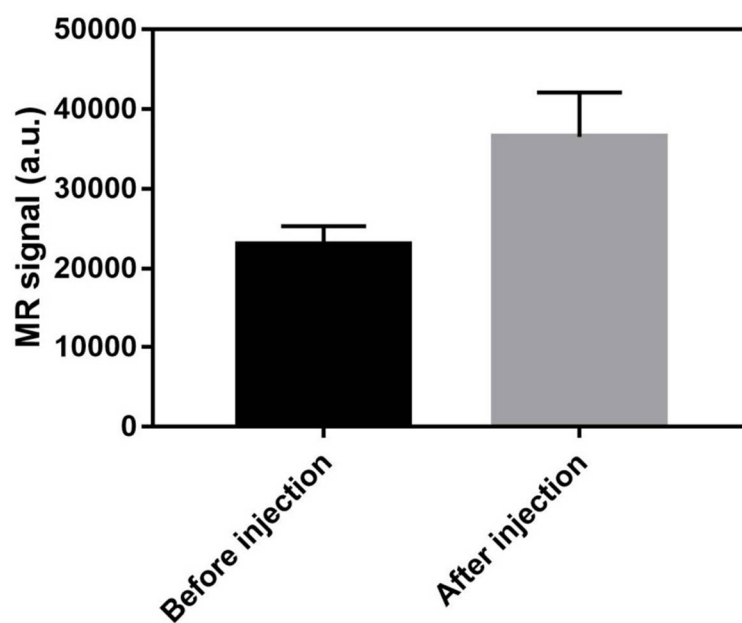

**Figure S8.** Relative MR signal intensity in tumour regions of mice before and after material injection.

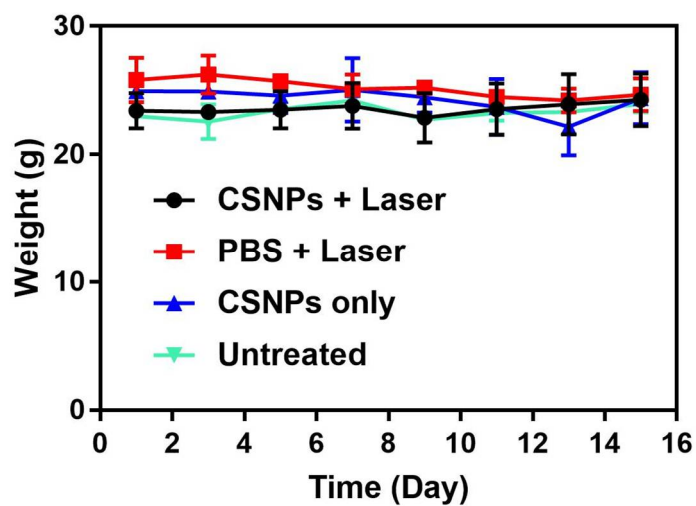

**Figure S9.** Average bodyweight curves of mice in different groups after various treatments in the CDX models.

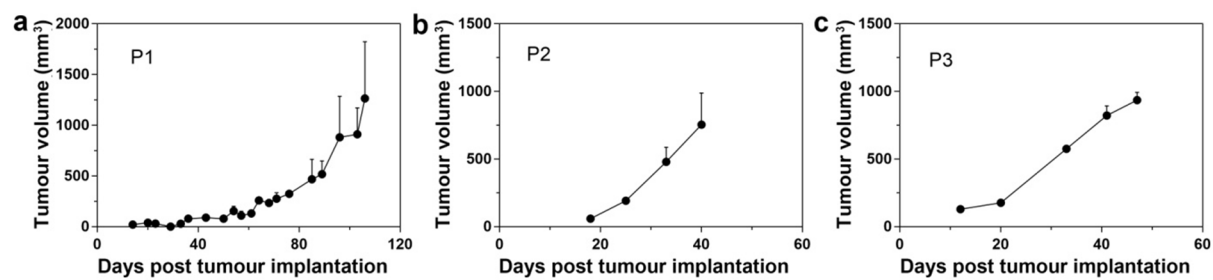

**Figure S10.** Tumour volume change curves of (a) P1, (b) P2, and (c) P3 mice in the PDX model.

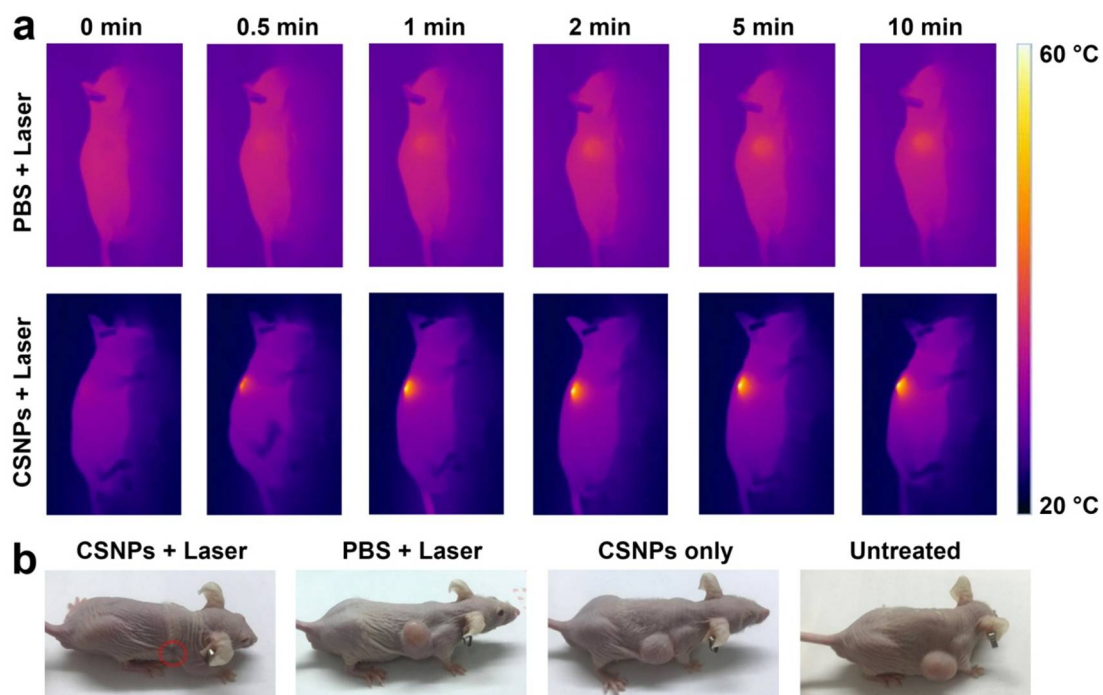

**Figure S11.** (a) IR thermal images of HNSCC mice with intratumour injection of PBS and  $\text{Cu}_{2-x}\text{S}@\text{MnS}$  CSNPs suspension under 808 nm laser irradiation taken at different time intervals in the PDX model. (b) Representative photos of mice collected on the 19<sup>th</sup> day after treatments.

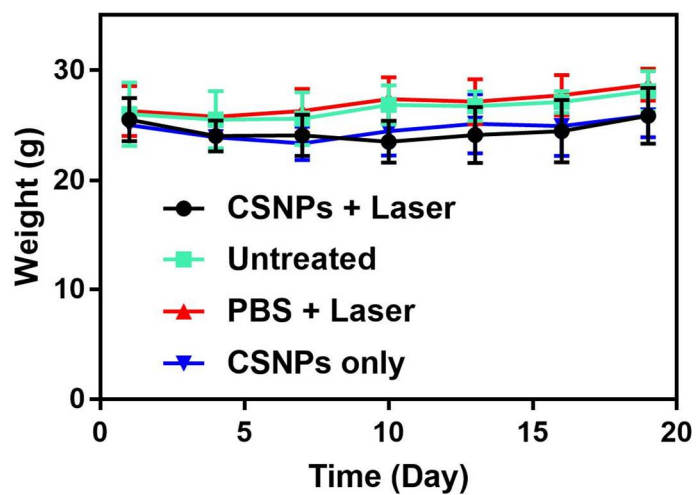

**Figure S12.** Average bodyweight curves of mice in different groups after various treatments in the PDX models.

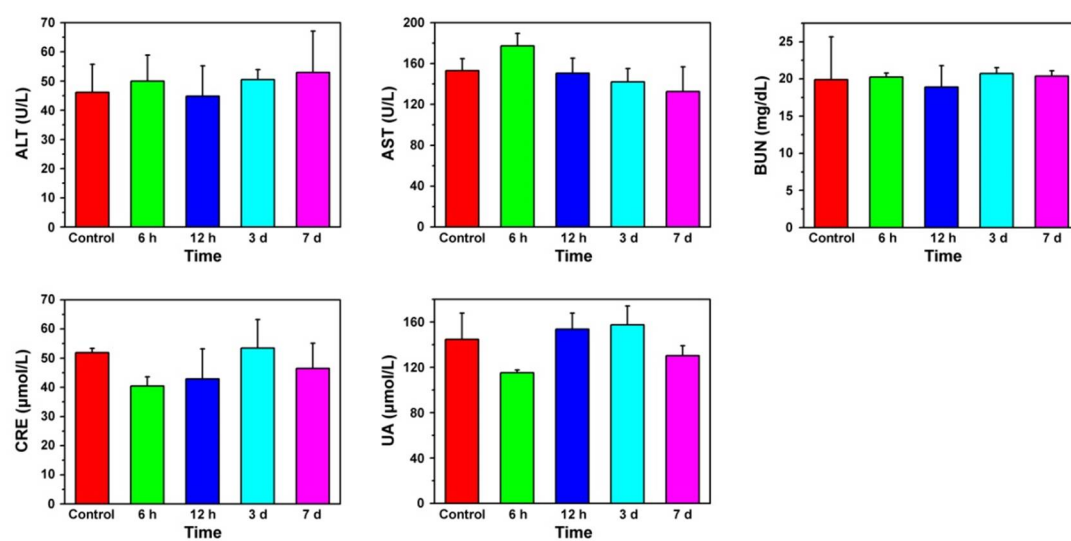

**Figure S13.** Blood biochemistry tests of mice with various treatments.

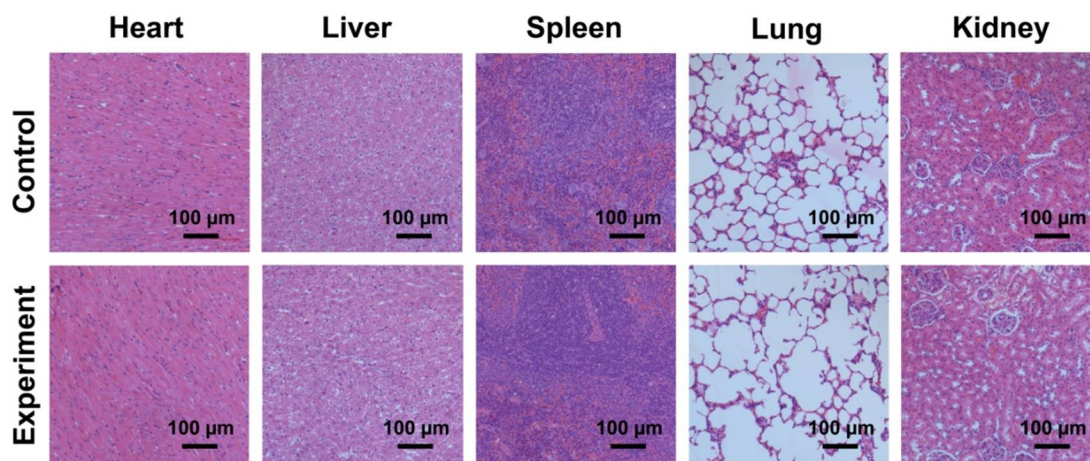

**Figure S14.** H&E-stained images of tissue sections from different organs of mice after  $\text{Cu}_2\text{-xS@MnS}$  CSNPs suspension injection (experiment) and healthy mice without treatment (control).

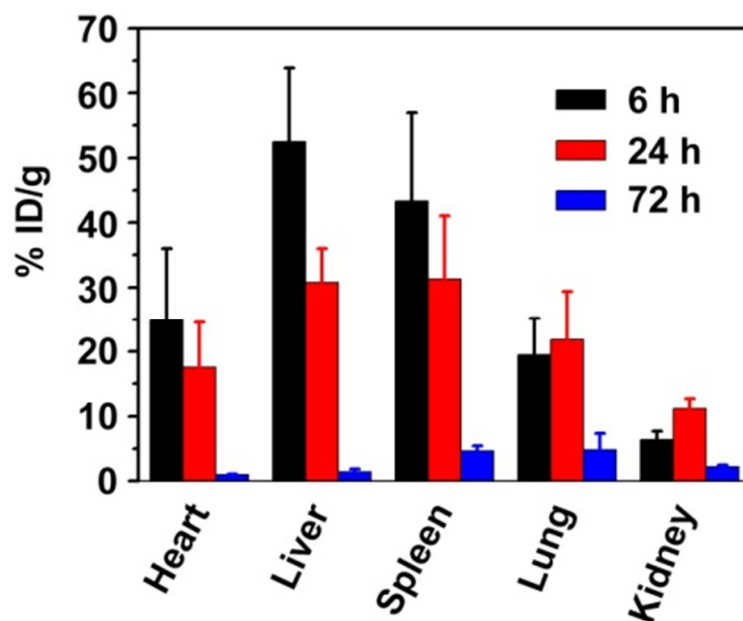

**Figure S15.** Tissue distributions of  $\text{Cu}_{2-x}\text{S}@\text{MnS}$  CSNPs post-injection.

## References

- [1] D. K. Roper, W. Ahn, M. Hoepfner, *J. Phys. Chem. C* **2007**, *111*, 3636.
- [2] Q. Tian, F. Jiang, R. Zou, Q. Liu, Z. Chen, M. Zhu, S. Yang, J. Wang, J. Wang, J. Hu, *ACS Nano* **2011**, *5*, 9761.
